# Supplementary material for: Computational Drug Recommendation Approaches toward Safe Polypharmacy
Source: bioRxiv or medRxiv preprint supplement (doi:10.1101/518415), 2019-03-24
Supplement: Supplementary file [file media-1.pdf]

# Computational Drug Recommendation Approaches toward Safe Polypharmacy

Wen-Hao Chiang, MS<sup>1</sup>, Xia Ning, PhD<sup>2\*</sup>

<sup>1</sup>Department of Computer & Information Science, Indiana University - Purdue University Indianapolis, Indianapolis, IN, USA;

<sup>2</sup>Department of Biomedical Informatics, The Ohio State University, Columbus, OH, USA

## Related Work

**Computational Methods for DDI and ADR Studies** Significant research efforts have focused on detecting DDIs, and can be broadly classified into four categories. Methods of the first category analyze medical literature and/or electronic medical records, and extract mentioned drug pairs<sup>1</sup>. Methods in the second category integrate various biochemical and molecular drug/target data to measure drug-drug similarities and score/predict pairwise DDIs. These data include phenotypic and genomic information<sup>2</sup>, and drug side effects<sup>3</sup>, etc. Methods of the third category leverage healthcare information on social media and online communities to detect DDIs<sup>4</sup>. The fourth category focuses on using numerical models to predict the dose responses to multiple drugs<sup>5</sup>. A recent thread is dedicated to understanding the interaction patterns among high-order DDIs, and how such patterns can relate to induced ADRs<sup>6</sup>.

**Recommender Systems** Top- $N$  recommender systems, which recommend the top- $N$  items that are most likely to be preferred by users, have been used in a variety of applications in e-commerce and social networking, etc<sup>7</sup>. Recommender systems have been recently applied to prioritizing healthcare information, due to a tremendous need for personalized healthcare<sup>8</sup>. Current applications along this line include recommending physicians to patients on specific diseases<sup>9</sup>, and recommending drugs for patient symptoms<sup>10</sup>, etc. However, to the best of our knowledge, very little research has been done on new prescription recommendation particularly with ADR concerns.

## Background

**Sparse Linear Method for top- $N$  Recommendation** Sparse Linear Method (SLIM)<sup>11</sup> is an efficient and state-of-the-art algorithm for top- $N$  recommendation that was initially designed for e-commerce applications. In the drug recommendation problem, given a drug prescription  $\mathbf{a}_i$ , SLIM models the score of how likely an additional drug  $d_j$  should be co-prescribed with  $\mathbf{a}_i$  as a sparse linear aggregation of the drugs in  $\mathbf{a}_i$ , that is,  $\tilde{a}_{ij} = \mathbf{a}_i \mathbf{w}_j^T$ , (1) where  $\tilde{a}_{ij}$  is the estimated score of  $d_j$  in  $\mathbf{a}_i$ , and  $\mathbf{w}_j^T$  is a sparse column vector of aggregation coefficients. Note that  $\tilde{a}_{ij} = 0$ , that is,  $d_j$  is not included in  $\mathbf{a}_i$  originally. Drugs with high scores calculated as above will be recommended to the prescription. Thus, the scores are referred to as recommendation scores, and a prescription composed of  $\mathbf{a}_i$  and a recommended drug  $d_j$  is referred to as a new prescription with respect to  $\mathbf{a}_i$ , denoted as  $\mathbf{a}_i \cup \{d_j\}$ . The intuition of using SLIM for drug recommendation will be discussed later in Section Joint SLIM and LogR Model: SLR on page 3.

To learn  $W = [\mathbf{w}_1^T, \mathbf{w}_2^T, \dots, \mathbf{w}_n^T]$ , SLIM solves the following optimization problem,

$$\min_W \text{SLIM}(A; W, \alpha, \lambda) = \frac{1}{2} \|A - AW\|_F^2 + \frac{\alpha}{2} \|W\|_F^2 + \lambda \|W\|_{\ell_1}, \quad \text{subject to } W \geq 0, \text{diag}(W) = 0, \quad (2)$$

where  $\|W\|_{\ell_1} = \sum_{i=1}^n \sum_{j=1}^n |w_{ij}|$  is the entry-wise  $\ell_1$ -norm of  $W$ , and  $\|\cdot\|_F$  is the matrix Frobenius norm. In SLIM,  $W$  converts a binary  $A$  into its estimation  $\tilde{A}$  of floating values, which could recover unseen non-zero entries in  $A$ .

**Logistic Regression for Label Prediction** We can formulate the problem of predicting whether a prescription of multiple drugs induces a particular ADR as a binary classification problem, and solve the problem using logistic regression (LogR):

$$p(y_i | \mathbf{a}_i; \mathbf{x}, c) = (1 + \exp(-y_i(\mathbf{a}_i \mathbf{x}^T + c)))^{-1}, \quad (3)$$

where  $\mathbf{x}^T$  and  $c$  are the parameters. To learn the parameters, LogR solves the following optimization problem,

$$\min_{\mathbf{x}, c} \text{LogR}(\mathbf{y} | A; \mathbf{x}, c, \beta, \gamma) = \sum_{i=1}^m \log\{1 + \exp[-y_i(\mathbf{a}_i \mathbf{x}^T + c)]\} + \frac{\beta}{2} \|\mathbf{x}\|_2^2 + \gamma \|\mathbf{x}\|_1, \quad (4)$$

where  $\mathbf{y} = [y_1; y_2; \dots; y_m]$ ,  $\|\mathbf{x}\|_1 = \sum_{i=1}^n |x_i|$ , and  $\|\mathbf{x}\|_2^2 = \sum_{i=1}^n x_i^2$ .

## Training SLR

The optimization problem 2 can be solved through the alternating direction method of multipliers (ADMM)<sup>12</sup>. We introduce a new variable  $Z$  and thus the following augmented Lagrangian as the new objective to optimize:

$$\begin{aligned}
& \min_{\substack{\Theta=\{W^+,W^-, \\ Z^+,Z^-, \mathbf{x}, c\}}} L(A^+, A^-, y^+, y^-; \Theta, \mathbf{u}^+, \mathbf{u}^-, \rho^+, \rho^-) = \\
& \quad \text{SLIM}(A^+; W^+, \alpha, \lambda) + \text{SLIM}(A^-; W^-, \alpha, \lambda) \\
& \quad \omega \{ \text{LogR}(\mathbf{y}^+ | \tilde{B}^+; \mathbf{x}, c, \beta, \gamma) + \text{LogR}(\mathbf{y}^- | \tilde{B}^-; \mathbf{x}, c, \beta, \gamma) \} \\
& \quad \mathbf{u}^{+\top} \mathbf{v}^+ + \frac{\rho^+}{2} \|\mathbf{v}^+\|_2^2 + \mathbf{u}^{-\top} \mathbf{v}^- + \frac{\rho^-}{2} \|\mathbf{v}^-\|_2^2, \\
& \text{subject to } \tilde{B}^+ = A^+ Z^+, \tilde{B}^- = A^- Z^-, \\
& \quad \mathbf{v}^+ = \text{vec}(W^+) - \text{vec}(Z^+), \mathbf{v}^- = \text{vec}(W^-) - \text{vec}(Z^-), \\
& \quad W^+ = Z^+, W^- = Z^-, W^+ \geq 0, W^- \geq 0, \\
& \quad \text{diag}(W^+) = 0, \text{diag}(W^-) = 0,
\end{aligned}$$

where  $\mathbf{u}^+$  and  $\mathbf{u}^-$  are the Lagrange multipliers;  $\rho^+, \rho^- \geq 0$  are the penalty parameters, and  $\text{vec}(\cdot)$  is the vectorization of a matrix. The algorithm to solve the optimization problem 2 is presented in Algorithm 1.

---

### Algorithm 1 Learning SLR

---

```

1: function SLR( $A, \omega, \alpha, \lambda, \beta, \gamma$ )
2:    $\rho^+ = 10, \rho^- = 10, \mathbf{u}_{(0)}^+ = \mathbf{0}, \mathbf{u}_{(0)}^- = \mathbf{0}, k = 0$ 
3:    $Z_{(0)}^+ = W_{(0)}^+, Z_{(0)}^- = W_{(0)}^-$ 
4:   learn  $W_{(0)}^+$  and  $W_{(0)}^-$  from SLIM (Equation 2)
5:   learn  $\mathbf{x}_{(0)}$  and  $c_{(0)}$  from LogR (Equation 4)
6:   while not converge do
7:      $\{W_{(k+1)}^+, W_{(k+1)}^-\} := \underset{W^+, W^-}{\text{argmin}} L(W_{(k)}^+, W_{(k)}^-, Z_{(k)}^+, Z_{(k)}^-),$ 
        $\mathbf{x}_{(k)}, c_{(k)}, \mathbf{u}_{(k)}^+, \mathbf{u}_{(k)}^-$ 
8:      $\{Z_{(k+1)}^+, Z_{(k+1)}^-\} := \underset{Z^+, Z^-}{\text{argmin}} L(W_{(k+1)}^+, W_{(k+1)}^-, Z_{(k)}^+, Z_{(k)}^-),$ 
        $\mathbf{x}_{(k)}, c_{(k)}, \mathbf{u}_{(k)}^+, \mathbf{u}_{(k)}^-$ 
9:      $\{\mathbf{x}_{(k+1)}, c_{(k+1)}\} := \underset{\mathbf{x}, c}{\text{argmin}} L(W_{(k+1)}^+, W_{(k+1)}^-, Z_{(k+1)}^+,$ 
        $Z_{(k+1)}^-, \mathbf{x}_{(k)}, c_{(k)}, \mathbf{u}_{(k)}^+, \mathbf{u}_{(k)}^-)$ 
10:     $\mathbf{u}_{(k+1)}^+ = \mathbf{u}_{(k)}^+ + \rho^+ (\text{vec}(W_{(k+1)}^+) - Z_{(k+1)}^+)$ 
11:     $\mathbf{u}_{(k+1)}^- = \mathbf{u}_{(k)}^- + \rho^- (\text{vec}(W_{(k+1)}^-) - Z_{(k+1)}^-)$ 
12:     $k = k + 1$ 
13:  end while
14:  return  $W_{(k+1)}^+, W_{(k+1)}^-, Z_{(k+1)}^+, Z_{(k+1)}^-, \mathbf{x}_{(k+1)}$  and  $c_{(k+1)}$ 
15: end function

```

---

In Algorithm 1, to solve for  $W$ , the problem boils down to a regularized least squares problem. To solve for  $Z$ , the problem boils down to a combination of a regularized logistic regression problem and a least squares problem. To solve for  $\mathbf{x}$  and  $c$ , the problem boils down to a regularized logistic regression problem. All these problems can be solved by gradient descent methods. The algorithm empirically converges.

## Examples of Co-Prescribed Drugs with Similar Indications

Table S1 presents some examples of co-prescribed drugs with similar indications.

## Additional Experimental Results

**Table S1:** Examples of Co-Prescribed Drugs with Similar Indications

| Co-prescribed drugs                                     | Indications                                            |
|---------------------------------------------------------|--------------------------------------------------------|
| atorvastatin, lovastatin, rosuvastatin, simvastatin     | high cholesterol                                       |
| citalopram, escitalopram                                | depression medication                                  |
| levofloxacin, methylprednisolone, prednisolone          | arthritis, blood problems, and immune system disorders |
| fluoxetine, paroxetine, sertraline                      | depression and other mental illnesses                  |
| alitretinoin, tretinoin                                 | acne and other skin conditions                         |
| conjugated estrogens, medroxyprogesterone, progesterone | birth control                                          |

### Maximum Possible Evaluation Metrics

We present the maximum possible  $\max(\text{rec}_P)$  and  $\max(\text{rec}_N)$  values that are used for  $\text{rec}_P$  and  $\text{rec}_N$  normalization in Table S2.

**Table S2:** Maximum Possible  $\text{rec}_P$  and  $\text{rec}_N$  Values

| N  | $A_{*+}^{\text{lst}}$ |                |                          | $A_{*-}^{\text{lst}}$ |                |                          | $A_{*u}^{\text{lst}}$ |                |                          | $A_{*all}$     |                |                          |
|----|-----------------------|----------------|--------------------------|-----------------------|----------------|--------------------------|-----------------------|----------------|--------------------------|----------------|----------------|--------------------------|
|    | $\text{rec}_P$        | $\text{rec}_N$ | $\text{HM}_{\text{rec}}$ | $\text{rec}_P$        | $\text{rec}_N$ | $\text{HM}_{\text{rec}}$ | $\text{rec}_P$        | $\text{rec}_N$ | $\text{HM}_{\text{rec}}$ | $\text{rec}_P$ | $\text{rec}_N$ | $\text{HM}_{\text{rec}}$ |
| 5  | 0.4567                | 0.0859         | 0.1436                   | 0.9033                | 0.2824         | 0.4324                   | 0.5361                | 0.0430         | 0.0804                   | 0.5369         | 0.0846         | 0.1469                   |
| 10 | 0.6419                | 0.1648         | 0.2596                   | 0.9706                | 0.4693         | 0.6322                   | 0.6739                | 0.0772         | 0.1387                   | 0.6863         | 0.1517         | 0.2481                   |
| 15 | 0.7440                | 0.2375         | 0.3582                   | 0.9854                | 0.5951         | 0.7394                   | 0.7704                | 0.1105         | 0.1932                   | 0.7782         | 0.2096         | 0.3299                   |
| 20 | 0.8116                | 0.3037         | 0.4412                   | 0.9938                | 0.6868         | 0.8079                   | 0.8347                | 0.1433         | 0.2444                   | 0.8392         | 0.2611         | 0.3982                   |

### Parameter Study

Table S3 presents the parameter study on  $\omega$  and  $\alpha$  as in Equation 2 on SLR-sli for top-5 (i.e.,  $N = 5$ ) drug recommendations on  $A_*^{\text{lst}}$ . We found all 0 or very small values (e.g.,  $10^{-6}$ ) for all the other parameters  $\lambda$  (parameter on  $\ell_1$ -norm regularization on SLIM component),  $\beta$  (parameter on  $\ell_2$ -norm regularization on LogR component) and  $\gamma$  (parameter on  $\ell_1$ -norm regularization on LogR component) lead to optimal performance. This indicates the very minor effects of these parameters on SLR-sli. Thus, we did not present studies on these parameters.

**Table S3:** Parameter Study of SLR-sli on  $A_*^{\text{lst}}$  ( $N = 5$ )

| $\omega \backslash \alpha$ | best $\overline{\text{rec}}_P$ |        |               |        |        | $\omega \backslash \alpha$ | best $\overline{\text{rec}}_N$ |        |        |               |        | $\omega \backslash \alpha$ | best $\text{HM}_{\text{rec}}$ |        |               |        |        |
|----------------------------|--------------------------------|--------|---------------|--------|--------|----------------------------|--------------------------------|--------|--------|---------------|--------|----------------------------|-------------------------------|--------|---------------|--------|--------|
|                            | 1                              | 5      | 10            | 50     | 500    |                            | 1                              | 10     | 20     | 50            | 100    |                            | 1                             | 5      | 10            | 50     | 100    |
| 0.0005                     | 0.2504                         | 0.2554 | 0.2575        | 0.2505 | 0.2283 | 0.1000                     | 0.3871                         | 0.3941 | 0.3949 | 0.3957        | 0.3937 | 0.0010                     | 0.3010                        | 0.3056 | 0.3080        | 0.3040 | 0.2997 |
| 0.0050                     | 0.2568                         | 0.2582 | 0.2599        | 0.2517 | 0.2283 | 0.5000                     | 0.3891                         | 0.3950 | 0.3961 | 0.3977        | 0.3956 | 0.0050                     | 0.3056                        | 0.3077 | 0.3098        | 0.3049 | 0.2995 |
| 0.0100                     | 0.2599                         | 0.2640 | <b>0.2654</b> | 0.2572 | 0.2285 | 0.8000                     | 0.3890                         | 0.3944 | 0.3951 | <b>0.3978</b> | 0.3940 | 0.0100                     | 0.3078                        | 0.3117 | <b>0.3136</b> | 0.3091 | 0.3037 |
| 0.5000                     | 0.2549                         | 0.2573 | 0.2567        | 0.2454 | 0.2072 | 1.0000                     | 0.3892                         | 0.3943 | 0.3959 | 0.3970        | 0.3943 | 0.5000                     | 0.2878                        | 0.2925 | 0.2898        | 0.2812 | 0.2792 |
| 1.0000                     | 0.2552                         | 0.2586 | 0.2577        | 0.2464 | 0.2075 | 5.0000                     | 0.3889                         | 0.3935 | 0.3937 | 0.3944        | 0.3938 | 1.0000                     | 0.2987                        | 0.2890 | 0.2961        | 0.2739 | 0.2653 |

The best performance is **bold**.

Recall that  $\omega$  is the trade-off parameter between SLIM and LogR components in SLR-sli, and  $\alpha$  is its parameter on  $\ell_2$ -norm regularization on SLIM component. Table S3 demonstrates a very similar trend in terms of  $\overline{\text{rec}}_P$ ,  $\overline{\text{rec}}_N$  and  $\text{HM}_{\text{rec}}$ , that is, as  $\omega$  becomes larger (i.e., the weight on LogR component becomes higher in SLR-sli), all  $\overline{\text{rec}}_P$ ,  $\overline{\text{rec}}_N$  and  $\text{HM}_{\text{rec}}$  values first increase and then decrease. This demonstrates the trade-off between the SLIM component and the LogR component in SLR-sli. Even though, the optimal  $\omega$  corresponds to a small value (e.g., 0.01). This may indicate that co-prescription pattern learning (via SLIM) is more difficult than ADR label prediction (via LogR). Similarly, as  $\alpha$  becomes larger (i.e., the regularization on parameter  $W$  of SLIM becomes stronger), all  $\overline{\text{rec}}_P$ ,  $\overline{\text{rec}}_N$  and  $\text{HM}_{\text{rec}}$  also first increase and then decrease. Smaller  $\alpha$  will introduce larger values in  $W$  compared to larger  $\alpha$ , and thus the relatively small optimal  $\alpha$  indicates that  $W$  captures strong patterns from prescriptions.

Table S4 presents parameter study of  $\eta$  on SLR-sli in  $A_*^{\text{lst}}$  for the best  $\overline{\text{rec}}_P$ ,  $\overline{\text{rec}}_N$ , and  $\text{HM}_{\text{rec}}$ . The parameter  $\eta$  is the frequency threshold for drugs in the SLIM recommendation list (i.e., Step 2 in Section ). When higher frequency

threshold is used, fewer drugs in SLIM recommendation list will be replaced, and the performance of SLR-sli in general decreases. This indicates that drug recommendation performance can be improved by considering the frequencies of drugs prescribed.

**Table S4:** Frequency Threshold Study on SLR-sli in  $A_{*}^{\text{st}}$

| $\eta$ | $\overline{\text{rec}}_{\text{p}}$ | $\overline{\text{rec}}_{\text{N}}$ | $\text{HM}_{\text{rec}}$ |
|--------|------------------------------------|------------------------------------|--------------------------|
| 1      | 0.2581                             | <b>0.3978</b>                      | 0.3120                   |
| 5      | <b>0.2654</b>                      | 0.3880                             | <b>0.3136</b>            |
| 10     | 0.2626                             | 0.3681                             | 0.3050                   |
| 15     | 0.2555                             | 0.3543                             | 0.2956                   |
| 20     | 0.2487                             | 0.3412                             | 0.2866                   |

The best performance is marked in **bold**.

**Table S5:** Top- $N$  Performance of SLR-sli

| N  | $A_{*+}^{\text{st}}$               |                                    |                          | $A_{*-}^{\text{st}}$               |                                    |                          | $A_{*u}^{\text{st}}$               |                                    |                          | $A_{*}^{\text{st}}$                |                                    |                          |
|----|------------------------------------|------------------------------------|--------------------------|------------------------------------|------------------------------------|--------------------------|------------------------------------|------------------------------------|--------------------------|------------------------------------|------------------------------------|--------------------------|
|    | $\overline{\text{rec}}_{\text{p}}$ | $\overline{\text{rec}}_{\text{N}}$ | $\text{HM}_{\text{rec}}$ | $\overline{\text{rec}}_{\text{p}}$ | $\overline{\text{rec}}_{\text{N}}$ | $\text{HM}_{\text{rec}}$ | $\overline{\text{rec}}_{\text{p}}$ | $\overline{\text{rec}}_{\text{N}}$ | $\text{HM}_{\text{rec}}$ | $\overline{\text{rec}}_{\text{p}}$ | $\overline{\text{rec}}_{\text{N}}$ | $\text{HM}_{\text{rec}}$ |
| 5  | 0.2530                             | 0.4131                             | 0.3137                   | 0.2847                             | 0.4407                             | 0.3459                   | 0.2541                             | 0.4005                             | 0.3107                   | 0.2654                             | 0.3836                             | 0.3136                   |
| 10 | 0.2956                             | 0.4252                             | 0.3486                   | 0.3636                             | 0.4408                             | 0.3985                   | 0.2914                             | 0.4041                             | 0.3385                   | 0.3055                             | 0.3913                             | 0.3431                   |
| 15 | 0.3278                             | 0.4240                             | 0.3697                   | 0.4191                             | 0.4506                             | 0.4342                   | 0.3061                             | 0.3950                             | 0.3448                   | 0.3321                             | 0.3940                             | 0.3604                   |
| 20 | 0.3538                             | 0.4250                             | 0.3861                   | 0.4573                             | 0.4631                             | 0.4601                   | 0.3201                             | 0.3847                             | 0.3493                   | 0.3551                             | 0.3965                             | 0.3747                   |

### Top- $N$ Performance

Table S5 presents the SLR-sli performance with  $N = 5, 10, 15,$  and  $20$  to-avoid and safe drugs recommended when SLR-sli achieves the best  $\text{HM}_{\text{rec}}$ . As  $N$  increases, all the  $\text{HM}_{\text{rec}}$  values increase, demonstrating that more true to-avoid and safe drugs are recommended. This indicates that SLR-sli is able to rank the true to-avoid and safe drugs on top. The maximum possible  $\max(\overline{\text{rec}}_{\text{p}})$  and  $\max(\overline{\text{rec}}_{\text{N}})$  values that are used for  $\overline{\text{rec}}_{\text{p}}$  and  $\overline{\text{rec}}_{\text{N}}$  normalization (Equation 3 and Equation 4) is presented in Table S2.

### Co-Prescription Patterns

We present the co-prescription patterns using  $W^{+}$  and  $W^{-}$  from SLR-sli of the best  $\text{HM}_{\text{rec}}$  performance on  $A_{*+}^{\text{st}}$ ,  $A_{*-}^{\text{st}}$  and  $A_{*u}^{\text{st}}$  in Table S6, S7 and S8, respectively, and the top-10 largest values in  $W^{+}$  and  $W^{-}$  are presented.

**Table S6:** Co-Prescription Patterns from SLR-sli on  $A_{*+}^{\text{st}}$

| $W^{+}$ |                        |                    |      | $W^{-}$ |                        |                   |      |
|---------|------------------------|--------------------|------|---------|------------------------|-------------------|------|
| $w$     | $d_1$                  | $d_2$              | freq | $w$     | $d_1$                  | $d_2$             | freq |
| 0.3437  | acetaminophen          | hydrocodone        | 133  | 0.2033  | acetaminophen          | hydrocodone       | 36   |
| 0.2236  | ethinyl estradiol      | etonogestrel       | 38   | 0.1918  | fluticasone propionate | salmeterol        | 35   |
| 0.2038  | fluticasone propionate | salmeterol         | 44   | 0.1848  | <b>emtricitabine</b>   | <b>tenofovir</b>  | 35   |
| 0.1783  | hydrochlorothiazide    | triamterene        | 32   | 0.1748  | <b>lamivudine</b>      | <b>zidovudine</b> | 42   |
| 0.1781  | <b>ezetimibe</b>       | <b>simvastatin</b> | 68   | 0.1700  | lopinavir              | <b>ritonavir</b>  | 36   |
| 0.1719  | sulfamethoxazole       | trimethoprim       | 31   | 0.1609  | exenatide              | metformin         | 40   |
| 0.1672  | pamidronate            | zoledronate        | 42   | 0.1535  | ethinyl estradiol      | norelgestromin    | 23   |
| 0.1587  | acetaminophen          | oxycodone          | 80   | 0.1466  | acetylsalicylic acid   | clopidogrel       | 29   |
| 0.1471  | salbutamol             | salmeterol         | 37   | 0.1228  | <b>ritonavir</b>       | <b>tenofovir</b>  | 36   |
| 0.1419  | acetylsalicylic acid   | ramipril           | 65   | 0.1142  | <b>atazanavir</b>      | <b>ritonavir</b>  | 25   |

In this table, “ $w$ ” is the value of the entry corresponding to the drug pairs in  $W^{+}/W^{-}$ ; “ $d_1$ ” and “ $d_2$ ” are the two drugs in the drug pair, and “freq” is the frequency of the corresponding drug pairs in training data  $A^{+}$  and  $A^{-}$ . Drugs that are reported in SIDER to induce myopathy on their own are **bold**.

### Case Study

**Table S7:** Co-Prescription Patterns from SLR-sli on  $A_{*l}^{\text{st}}$ 

| $W^+$  |                        |                  |      | $W^-$  |                        |                     |      |
|--------|------------------------|------------------|------|--------|------------------------|---------------------|------|
| $w$    | $d_1$                  | $d_2$            | freq | $w$    | $d_1$                  | $d_2$               | freq |
| 0.5659 | ethinyl estradiol      | etonogestrel     | 38   | 0.4854 | acetaminophen          | hydrocodone         | 36   |
| 0.5309 | acetaminophen          | hydrocodone      | 13   | 0.4660 | ethinyl estradiol      | norelgestromin      | 23   |
| 0.4662 | hydrochlorothiazide    | triamterene      | 32   | 0.4625 | <b>emtricitabine</b>   | <b>tenofovir</b>    | 35   |
| 0.4541 | sulfamethoxazole       | trimethoprim     | 31   | 0.4519 | fluticasone propionate | salmeterol          | 35   |
| 0.4430 | fluticasone propionate | salmeterol       | 44   | 0.4039 | lopinavir              | <b>ritonavir</b>    | 36   |
| 0.3633 | acetaminophen          | codeine          | 27   | 0.3393 | budesonide             | formoterol          | 17   |
| 0.3607 | amoxicillin            | clavulanate      | 22   | 0.3324 | conjugated estrogens   | medroxyprogesterone | 17   |
| 0.3596 | pamidronate            | zoledronate      | 42   | 0.3311 | fluorouracil           | leucovorin          | 18   |
| 0.3540 | carbidopa              | levodopa         | 17   | 0.3278 | <b>lamivudine</b>      | <b>zidovudine</b>   | 42   |
| 0.3345 | <b>emtricitabine</b>   | <b>tenofovir</b> | 22   | 0.2974 | acetylsalicylic acid   | clopidogrel         | 29   |

In this table, “ $w$ ” is the value of the entry corresponding to the drug pairs in  $W^+/W^-$ ; “ $d_1$ ” and “ $d_2$ ” are the two drugs in the drug pair, and “freq” is the frequency of the corresponding drug pairs in training data  $A^+$  and  $A^-$ . Drugs that are reported in SIDER to induce myopathy on their own are **bold**.

**Table S8:** Co-Prescription Patterns from SLR-sli on  $A_{*u}^{\text{st}}$ 

| $W^+$  |                     |                    |      | $W^-$  |                      |                   |      |
|--------|---------------------|--------------------|------|--------|----------------------|-------------------|------|
| $w$    | $d_1$               | $d_2$              | freq | $w$    | $d_1$                | $d_2$             | freq |
| 0.8906 | carbidopa           | levodopa           | 17   | 0.9154 | ethinyl estradiol    | norelgestromin    | 23   |
| 0.8747 | ethinyl estradiol   | etonogestrel       | 38   | 0.8934 | amphetamine          | dextroamphetamine | 8    |
| 0.8348 | amoxicillin         | clavulanate        | 22   | 0.8851 | buprenorphine        | naloxone          | 9    |
| 0.8080 | sulfamethoxazole    | trimethoprim       | 31   | 0.8750 | sulfamethoxazole     | trimethoprim      | 8    |
| 0.7979 | buprenorphine       | naloxone           | 9    | 0.8276 | <b>emtricitabine</b> | <b>tenofovir</b>  | 35   |
| 0.7973 | ethinyl estradiol   | norgestimate       | 10   | 0.7385 | piperacillin         | tazobactam        | 3    |
| 0.7755 | prazepam            | <b>venlafaxine</b> | 4    | 0.7309 | lopinavir            | <b>ritonavir</b>  | 36   |
| 0.7734 | hydrochlorothiazide | triamterene        | 32   | 0.7160 | fluorouracil         | leucovorin        | 18   |
| 0.7400 | cyproterone         | <b>simvastatin</b> | 4    | 0.7158 | acetaminophen        | hydrocodone       | 36   |
| 0.7389 | amphetamine         | dextroamphetamine  | 6    | 0.7126 | budesonide           | formoterol        | 17   |

In this table, “ $w$ ” is the value of the entry corresponding to the drug pairs in  $W^+/W^-$ ; “ $d_1$ ” and “ $d_2$ ” are the two drugs in the drug pair, and “freq” is the frequency of the corresponding drug pairs in training data  $A^+$  and  $A^-$ . Drugs that are reported in SIDER to induce myopathy on their own are **bold**.

Table S9 presents some examples of testing prescriptions and their recommended to-avoid drugs from SLR-sli such that the corresponding new prescriptions (i.e., testing prescriptions and recommended drugs together) are ADR-inducing.

Table S10 presents some examples of testing prescriptions and their recommended safe drugs from SLR-sli such that the corresponding new prescriptions (i.e., testing prescriptions and recommended drugs together) are ADR-free.

## References

- [1] Srinivasan V Iyer, Rave Harpaz, Paea LePendu, Anna Bauer-Mehren, and Nigam H Shah. Mining clinical text for signals of adverse drug-drug interactions. *Journal of the American Medical Informatics Association*, pages 353–362, 2014.
- [2] Feixiong Cheng and Zhongming Zhao. Machine learning-based prediction of drug–drug interactions by integrating drug phenotypic, therapeutic, chemical, and genomic properties. *Journal of the American Medical Informatics Association*, 21(e2):e278–e286, 2014.
- [3] Nicholas P Tatonetti, JC Denny, SN Murphy, GH Fernald, G Krishnan, V Castro, P Yue, PS Tsau, I Kohane, DM Roden, et al. Detecting drug interactions from adverse-event reports: interaction between paroxetine and pravastatin increases blood glucose levels. *Clinical Pharmacology & Therapeutics*, 90(1):133–142, 2011.

- [4] Haodong Yang and Christopher C Yang. Harnessing social media for drug-drug interactions detection. In *Healthcare Informatics (ICHI), 2013 IEEE International Conference on*, pages 22–29. IEEE, 2013.
- [5] Chien-Wei Chiang, Pengyue Zhang, Xueying Wang, Lei Wang, Shijun Zhang, Xia Ning, Li Shen, Sara K Quinney, and Lang Li. Translational high-dimensional drug interaction discovery and validation using health record databases and pharmacokinetics models. *Clinical Pharmacology & Therapeutics*, 103(2):287–295, 2018.
- [6] Xia Ning, Titus Schleyer, Li Shen, and Lang Li. Pattern discovery from directional high-order drug-drug interaction relations. In *Healthcare Informatics (ICHI), 2017 IEEE International Conference on*, pages 154–162. IEEE, 2017.
- [7] Francesco Ricci, Lior Rokach, and Bracha Shapira. Introduction to recommender systems handbook. In *Recommender systems handbook*, pages 1–35. Springer, 2011.
- [8] Martin Wiesner and Daniel Pfeifer. Health recommender systems: Concepts, requirements, technical basics and challenges. *International Journal of Environmental Research and Public Health*, 11(3):2580–2607, 2014.
- [9] Li Guo, Bo Jin, Cuili Yao, Haoyu Yang, Degen Huang, and Fei Wang. Which doctor to trust: A recommender system for identifying the right doctors. *Journal of medical Internet research*, 18(7), 2016.
- [10] Qian Zhang, Guangquan Zhang, Jie Lu, and Dianshuang Wu. A framework of hybrid recommender system for personalized clinical prescription. In *2015 10th International Conference on Intelligent Systems and Knowledge Engineering (ISKE)*, pages 189–195, Nov 2015.
- [11] Xia Ning and George Karypis. Slim: Sparse linear methods for top-n recommender systems. In *Data Mining (ICDM), 2011 IEEE 11th International Conference on*, pages 497–506. IEEE, 2011.
- [12] Stephen Boyd, Neal Parikh, Eric Chu, Borja Peleato, and Jonathan Eckstein. Distributed optimization and statistical learning via the alternating direction method of multipliers. *Foundations and Trends® in Machine Learning*, 3(1):1–122, 2011.

**Table S9:** To-Avoid Drug Recommendation from SLR-sli

| subset                                  | testing prescription                                                                                                | recommendation        |
|-----------------------------------------|---------------------------------------------------------------------------------------------------------------------|-----------------------|
| $A_{*+}^{1st}$                          | calcipotriol, <b>cerivastatin</b> , <b>fenofibrate</b> , gliclazide, <b>rosuvastatin</b> , sulfasalazine            | <b>atorvastatin</b>   |
|                                         | acetylsalicylic acid, amlodipine, bisoprolol, felodipine, finasteride, lisinopril                                   | <b>atorvastatin</b>   |
|                                         | acetylsalicylic acid, clopidogrel, cyclosporine, <b>fluvastatin</b> , gabapentin, mycophe-                          | metoprolol            |
|                                         | nolate mofetil, pantoprazole, prednisone                                                                            |                       |
|                                         | carboplatin, cetuximab, fluticasone propionate, folic acid, hydroxocobalamin, salmeterol                            |                       |
|                                         | pemetrexed, salbutamol                                                                                              |                       |
|                                         | acetylsalicylic acid, atenolol                                                                                      | <b>simvastatin</b>    |
| $A_{*-}^{1st}$                          | fusidic acid, <b>simvastatin</b>                                                                                    | ramipril              |
|                                         | propofol, valproic acid                                                                                             | lamotrigine           |
|                                         | acetylsalicylic acid, bisoprolol, furosemide, metformin, ramipril                                                   | <b>atorvastatin</b>   |
|                                         | acetylsalicylic acid, amlodipine, <b>atorvastatin</b> , isosorbide mononitrate, lisinopril,                         | atenolol              |
|                                         | olmesartan, omeprazole, quinine                                                                                     |                       |
|                                         | dicyclomine, gabapentin, lansoprazole, lorazepam, pamidronate, zoledronate, zolpi-                                  | oxycodone             |
|                                         | dem                                                                                                                 |                       |
| $A_{*-u}^{1st}$                         | amlodipine, <b>ezetimibe</b>                                                                                        | <b>simvastatin</b>    |
|                                         | irbesartan, metformin                                                                                               | <b>rosuvastatin</b>   |
|                                         | <b>dexamethasone</b> , folic acid                                                                                   | lenalidomide          |
|                                         | clonazepam, phenobarbital                                                                                           | carbamazepine         |
|                                         | acetaminophen, darunavir, <b>dexamethasone</b> , esomeprazole, ondansetron, <b>ritonavir</b> , <b>emtricitabine</b> |                       |
|                                         | sulfamethoxazole, <b>tenofovir</b> , trabectedin, trimethoprim                                                      |                       |
|                                         | acetylsalicylic acid, carvedilol, isosorbide mononitrate, nitroglycerin, ramipril, ra-                              | <b>simvastatin</b>    |
| $A_{*u}^{1st}$                          | nolazine, trimethoprim                                                                                              |                       |
|                                         | acetylsalicylic acid, alprazolam, <b>fluoxetine</b> , hydrocodone, <b>phenytoin</b> , <b>rosuvastatin</b>           | acetaminophen         |
|                                         | acetylsalicylic acid, amlodipine, esomeprazole, hydrochlorothiazide, potassium                                      | furosemide            |
|                                         | chloride, sorafenib, triamterene                                                                                    |                       |
|                                         | <b>dexamethasone</b> , triazolam                                                                                    | <b>atorvastatin</b>   |
|                                         | zuclopenthixol                                                                                                      | <b>simvastatin</b>    |
|                                         | mycophenolate mofetil, <b>simvastatin</b>                                                                           | cyclosporine          |
| $A_{*}^{1st}$                           | risperidone                                                                                                         | haloperidol           |
|                                         | acetylsalicylic acid, buprenorphine, clopidogrel, flucloxacillin, fusidic acid, metron-                             | <b>atorvastatin</b>   |
|                                         | idazole, <b>pregabalin</b> , ramipril                                                                               |                       |
|                                         | acetylsalicylic acid, amlodipine, bisoprolol, felodipine, finasteride, lisinopril                                   | <b>atorvastatin</b>   |
|                                         | acetaminophen, amitriptyline, bupropion, <b>fluoxetine</b> , gabapentin, oxycodone, silde-                          | hydrocodone           |
|                                         | nafil, <b>simvastatin</b> , valdecoxib, <b>venlafaxine</b>                                                          |                       |
|                                         | acetaminophen, cephalexin, diphenhydramine, etonogestrel, levothyroxine, methi-                                     | ethinyl estradiol     |
| mazole, metoprolol, nadolol, salbutamol |                                                                                                                     |                       |
| $A_{*}^{1st}$                           | <b>fluoxetine</b>                                                                                                   | <b>paroxetine</b>     |
|                                         | prazepam                                                                                                            | <b>atorvastatin</b>   |
|                                         | <b>clarithromycin</b> , <b>simvastatin</b>                                                                          | amoxicillin           |
|                                         | cyclosporine, methotrexate                                                                                          | mycophenolate mofetil |
|                                         |                                                                                                                     |                       |

In this table, "recommendation" represents the recommended drug. Drugs that are reported in SIDER to induce myopathy on their own are **bold**.

**Table S10: Safe Drug Recommendation from SLR-sli**

| subset          | testing prescription                                                                                                   | recommendation          |
|-----------------|------------------------------------------------------------------------------------------------------------------------|-------------------------|
| $A_{**+}^{tst}$ | abacavir, <b>atazanavir</b> , <b>lamivudine</b> , lopinavir, <b>ritonavir</b>                                          | <b>zidovudine</b>       |
|                 | cyclophosphamide, doxorubicin, prednisolone, vincristine                                                               | <b>dexamethasone</b>    |
|                 | cyclophosphamide, cytarabine, <b>dexamethasone</b> , doxorubicin, methotrexate, vincristine                            |                         |
|                 | thioguanine                                                                                                            |                         |
|                 | busulfan, cyclophosphamide, cyclosporine, methotrexate                                                                 | prednisolone            |
| $A_{*-}^{tst}$  | acetylsalicylic acid, <b>dexamethasone</b>                                                                             | <b>bortezomib</b>       |
|                 | acetylsalicylic acid, varenicline                                                                                      | <b>simvastatin</b>      |
|                 | <b>methylprednisolone</b> , prednisolone                                                                               | azathioprine            |
|                 | carboplatin, vinorelbine                                                                                               | cetuximab               |
|                 | darunavir, <b>emtricitabine</b> , etravirine, <b>ritonavir</b> , <b>tenofovir</b> , tipranavir                         | <b>raltegravir</b>      |
| $A_{*-}^{tst}$  | cyclophosphamide, cytarabine, doxorubicin, methotrexate, thioguanine, vincristine                                      | <b>dexamethasone</b>    |
|                 | <b>bortezomib</b> , cisplatin, cyclophosphamide, <b>dexamethasone</b> , etoposide, thalidomide                         | melphalan               |
|                 | bleomycin, cyclophosphamide, doxorubicin, etoposide, procarbazine, vincristine                                         | prednisone              |
|                 | stavudine, <b>tenofovir</b>                                                                                            | <b>emtricitabine</b>    |
|                 | sertraline, topiramate                                                                                                 | <b>phenytoin</b>        |
| $A_{*u}^{tst}$  | <b>atorvastatin</b> , solifenacin                                                                                      | amlodipine              |
|                 | everolimus, prednisolone                                                                                               | mycophenolic acid       |
|                 | <b>efavirenz</b> , <b>lamivudine</b> , lopinavir, <b>ritonavir</b> , <b>tenofovir</b> , <b>zidovudine</b>              | <b>emtricitabine</b>    |
|                 | carboplatin, diphenhydramine, granisetron, paclitaxel, ranitidine                                                      | <b>dexamethasone</b>    |
|                 | <b>bortezomib</b> , cisplatin, cyclophosphamide, <b>dexamethasone</b> , etoposide, melphalan                           | doxorubicin             |
| $A_{*u}^{tst}$  | bleomycin, cyclophosphamide, doxorubicin, etoposide, prednisolone, procarbazine                                        | vincristine             |
|                 | <b>emtricitabine</b> , fosamprenavir                                                                                   | <b>ritonavir</b>        |
|                 | albendazole                                                                                                            | <b>dexamethasone</b>    |
|                 | <b>hydroxychloroquine</b> , risedronate                                                                                | prednisone <sup>4</sup> |
|                 | calcium                                                                                                                | valproic acid           |
| $A_{*}^{tst}$   | lopinavir, nevirapine, <b>raltegravir</b> , <b>ritonavir</b> , <b>tenofovir</b> , <b>zidovudine</b>                    | <b>lamivudine</b>       |
|                 | cyclophosphamide, cytarabine, doxorubicin, methotrexate, thioguanine, vincristine                                      | <b>dexamethasone</b>    |
|                 | <b>atazanavir</b> , <b>efavirenz</b> , <b>emtricitabine</b> , <b>lamivudine</b> , <b>tenofovir</b> , <b>zidovudine</b> | stavudine               |
|                 | acetylsalicylic acid, ciprofloxacin, erythromycin, meropenem, metronidazole, te-                                       | clopidogrel             |
|                 | icoplanin, warfarin                                                                                                    |                         |
| $A_{*}^{tst}$   | nevirapine, <b>tenofovir</b>                                                                                           | <b>zidovudine</b>       |
|                 | estradiol, levothyroxine                                                                                               | <b>progesterone</b>     |
|                 | <b>rofecoxib</b> , rosiglitazone                                                                                       | glyburide               |
|                 | amlodipine, olmesartan                                                                                                 | acetylsalicylic acid    |

In this table, “recommendation” represents the recommended drug. Drugs that are reported in SIDER to induce myopathy on their own are **bold**.
